# Supplementary material for: In Silico, In Vitro, and In Vivo Investigations on Adapalene as Repurposed Third Generation Retinoid against Multiple Myeloma and Leukemia
Source: MDPI journal article supplement (doi:10.3390/cancers15164136), 2023-08-16
Supplement: s1 [file s1]

Figure S1.

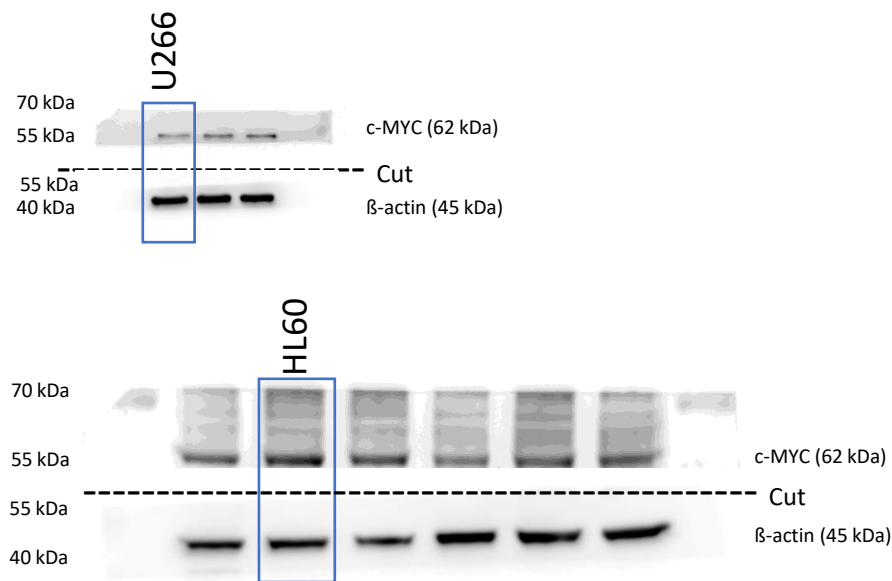

|                   | U266    | HL60    |
|-------------------|---------|---------|
| c-MYC intensity   | 73.666  | 122.993 |
| β-actin intensity | 150.332 | 79.604  |
| c-MYC/β-actin     | 0.490   | 1.545   |

Figure S1. Original western blots for Figure 1A. Protein band densitometric analysis was performed by ImageJ software and is shown in the table.

Figure S2.

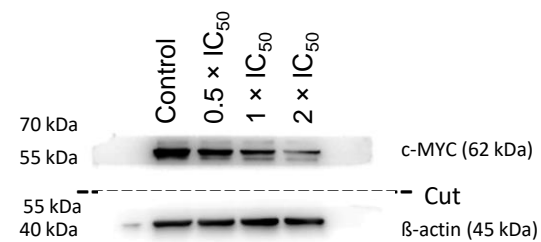

|                          | Control | $0.5 \times IC_{50}$ | $1 \times IC_{50}$ | $2 \times IC_{50}$ |
|--------------------------|---------|----------------------|--------------------|--------------------|
| c-MYC intensity          | 104.025 | 66.549               | 45.786             | 26.609             |
| $\beta$ -actin intensity | 89.794  | 91.85                | 116.131            | 99.676             |
| c-MYC/ $\beta$ -actin    | 1.158   | 0.724                | 0.394              | 0.267              |

Figure S2. Original western blots for Figure 5 A. Protein band densitometric analysis was performed by ImageJ software and is shown in the table.

Figure S3.

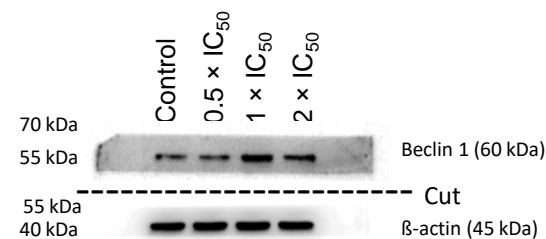

|                          | Control | $0.5 \times IC_{50}$ | $1 \times IC_{50}$ | $2 \times IC_{50}$ |
|--------------------------|---------|----------------------|--------------------|--------------------|
| Beclin 1 intensity       | 142.747 | 145.483              | 198.498            | 175.874            |
| $\beta$ -actin intensity | 182.468 | 180.702              | 192.139            | 184.009            |
| Beclin 1/ $\beta$ -actin | 0.782   | 0.805                | 1.033              | 0.955              |

Figure S3. Original western blots for Figure 11 C. Protein band densitometric analysis was performed by ImageJ software and is shown in the table.

Figure S4.

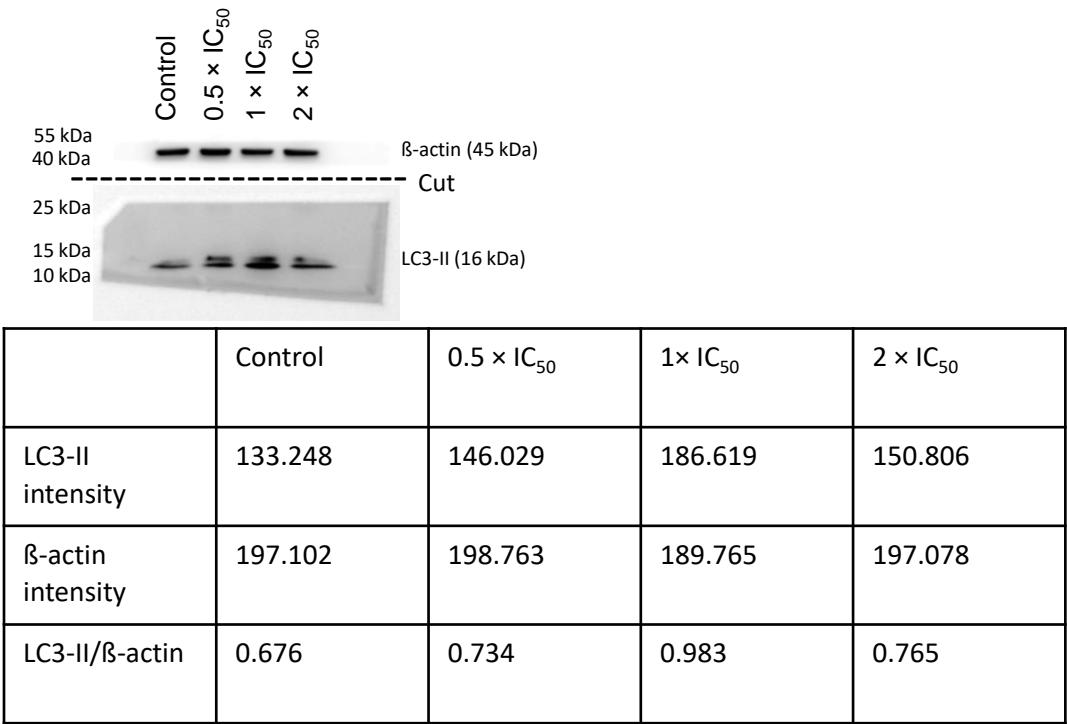

Figure S4. Original western blots for Figure 11 C. Protein band densitometric analysis was performed by ImageJ software and is shown in the table.

Figure S5.

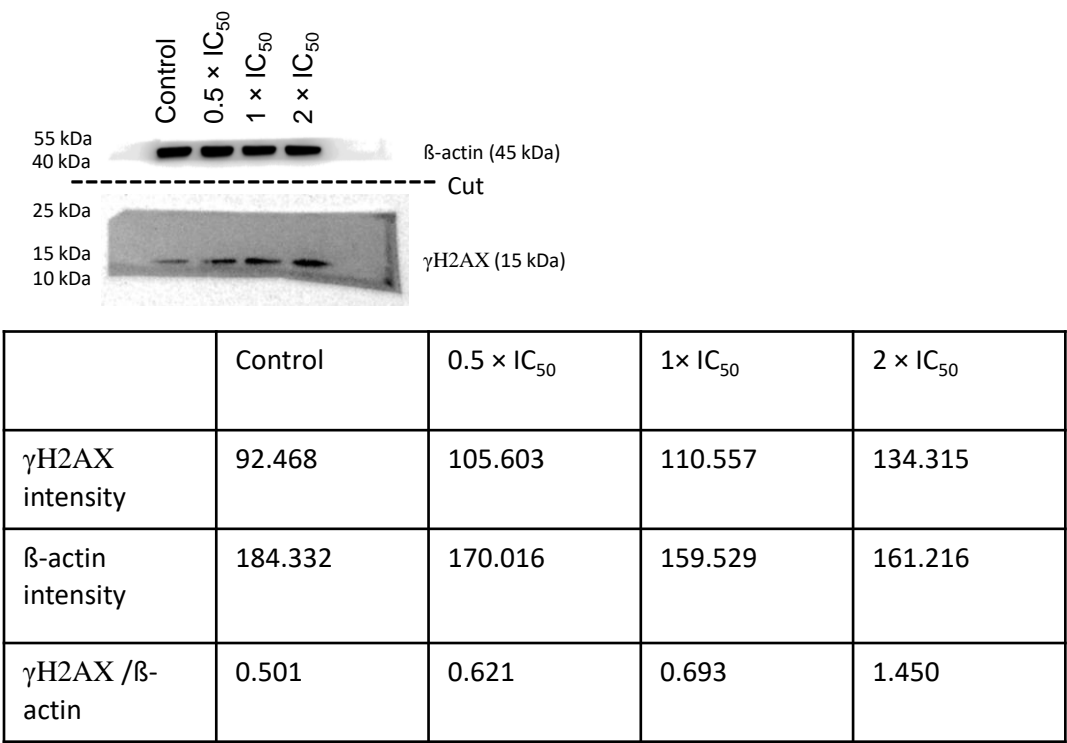

Figure S5. Original western blots for Figure 11 C. Protein band densitometric analysis was performed by ImageJ software and is shown in the table.

Supplementary Table S1: Binding affinities (kcal/mol) of the top 170 FDA compounds as identified by PyRx.

| Zinc code         | Pyr-x binding affinity (kcal/mol) | Zinc code        | Pyr-x binding affinity (kcal/mol) | Zinc code        | Pyr-x binding affinity (kcal/mol) |
|-------------------|-----------------------------------|------------------|-----------------------------------|------------------|-----------------------------------|
| ZINC000052955754  | -8.03                             | ZINC000169621200 | -7.17                             | ZINC000004097343 | -6.93                             |
| ZINC000003978005  | -7.90                             | ZINC000003784182 | -7.17                             | ZINC000070466416 | -6.93                             |
| ZINC000006716957  | -7.73                             | ZINC000164760756 | -7.13                             | ZINC000169621231 | -6.90                             |
| ZINC000000537928  | -7.70                             | ZINC000100022637 | -7.13                             | ZINC000169344691 | -6.90                             |
| ZINC000001612996  | -7.70                             | ZINC000004175630 | -7.10                             | ZINC000014210642 | -6.90                             |
| ZINC0000084668739 | -7.60                             | ZINC000001530886 | -7.10                             | ZINC000148723177 | -6.90                             |
| ZINC000064033452  | -7.60                             | ZINC000003816287 | -7.10                             | ZINC000169621219 | -6.87                             |
| ZINC000000896717  | -7.57                             | ZINC000068202099 | -7.07                             | ZINC000030691797 | -6.87                             |
| ZINC000012503187  | -7.53                             | ZINC000068204830 | -7.07                             | ZINC000001550477 | -6.87                             |
| ZINC000100073786  | -7.50                             | ZINC000003977978 | -7.03                             | ZINC000005844788 | -6.87                             |
| ZINC000040430143  | -7.40                             | ZINC000000000903 | -7.00                             | ZINC000003993855 | -6.83                             |
| ZINC000036701290  | -7.37                             | ZINC000000001370 | -7.00                             | ZINC000004212851 | -6.83                             |
| ZINC000008101127  | -7.33                             | ZINC000000538312 | -7.00                             | ZINC000016052277 | -6.83                             |
| ZINC000027428713  | -7.33                             | ZINC000001481956 | -7.00                             | ZINC000100036924 | -6.83                             |
| ZINC000013831130  | -7.27                             | ZINC000004214700 | -7.00                             | ZINC000034806477 | -6.83                             |
| ZINC000001996117  | -7.27                             | ZINC000014879992 | -7.00                             | ZINC000053683151 | -6.83                             |
| ZINC000019796080  | -7.23                             | ZINC000100017856 | -7.00                             | ZINC000169621215 | -6.83                             |
| ZINC000203757351  | -7.23                             | ZINC000009574770 | -6.97                             | ZINC000019632618 | -6.83                             |
| ZINC000011679756  | -7.23                             | ZINC000034089131 | -6.97                             | ZINC000000968264 | -6.80                             |
| ZINC000169621228  | -7.20                             | ZINC000029416466 | -6.97                             | ZINC000000537891 | -6.80                             |
| ZINC000000601317  | -7.20                             | ZINC000035328014 | -6.97                             | ZINC000012503068 | -6.80                             |
| ZINC000003925861  | -7.20                             | ZINC000164760874 | -6.97                             | ZINC000066166864 | -6.80                             |
| ZINC000003939013  | -7.17                             | ZINC000000896557 | -6.97                             | ZINC000096903163 | -6.80                             |
| ZINC000003938482  | -7.17                             | ZINC000052716421 | -6.97                             | ZINC000003826253 | -6.77                             |
| ZINC000100014909  | -7.17                             | ZINC000100378061 | -6.93                             | ZINC000004098633 | -6.77                             |
| ZINC000004099009  | -7.17                             | ZINC000003872566 | -6.93                             | ZINC000003927822 | -6.77                             |

| Zinc code        | Pyr-x binding affinity (kcal/mol) | Zinc code        | Pyr-x binding affinity (kcal/mol) |
|------------------|-----------------------------------|------------------|-----------------------------------|
| ZINC000084758235 | -6.77                             | ZINC000100018598 | -6.57                             |
| ZINC000095551509 | -6.73                             | ZINC000003914596 | -6.53                             |
| ZINC000049783788 | -6.73                             | ZINC000001529323 | -6.50                             |
| ZINC000253630390 | -6.73                             | ZINC000003881958 | -6.47                             |
| ZINC000169621230 | -6.70                             | ZINC000118912517 | -6.43                             |
| ZINC000000538273 | -6.70                             | ZINC000003824921 | -6.37                             |
| ZINC000003797541 | -6.70                             | ZINC000001850377 | -6.37                             |
| ZINC000004629876 | -6.70                             | ZINC000000537795 | -6.37                             |
| ZINC000169621220 | -6.70                             | ZINC000003813083 | -6.33                             |
| ZINC000052509366 | -6.70                             | ZINC000003830716 | -6.30                             |
| ZINC000003817234 | -6.67                             | ZINC000011617039 | -6.30                             |
| ZINC000096006018 | -6.67                             | ZINC000011616925 | -6.17                             |
| ZINC000028639340 | -6.63                             | ZINC000011681534 | -6.10                             |
| ZINC000000643153 | -6.63                             |                  |                                   |
| ZINC000001493878 | -6.63                             |                  |                                   |
| ZINC000013129998 | -6.63                             |                  |                                   |
| ZINC000043100953 | -6.63                             |                  |                                   |
| ZINC000003921872 | -6.60                             |                  |                                   |
| ZINC000008577218 | -6.60                             |                  |                                   |
| ZINC000014768621 | -6.60                             |                  |                                   |
| ZINC000003977777 | -6.60                             |                  |                                   |
| ZINC000043100709 | -6.60                             |                  |                                   |
| ZINC000094566093 | -6.60                             |                  |                                   |
| ZINC000096006024 | -6.60                             |                  |                                   |
| ZINC000169621223 | -6.60                             |                  |                                   |
| ZINC000011681563 | -6.57                             |                  |                                   |

Supplementary table S2: An overview of the molecular docking results of the top 117 FDA compounds as determined by AutoDock 4.2.6 tools. A cut-off of -6.6 kcal/mol was set and any FDA compound with lower binding energy was identified and its function was determined. Based on their function, we proceeded our study with the compounds highlighted in bold and with red squares.

| Zinc code               | Lowest binding energy (kcal/mol) | Predicted Ki (μM) | Compound Identity | Application                                                                                                                         |
|-------------------------|----------------------------------|-------------------|-------------------|-------------------------------------------------------------------------------------------------------------------------------------|
| ZINC000100073786        | -8.06                            | 1.23              | Ecamsule          | Filter out UVA rays                                                                                                                 |
| ZINC000001530886        | -7.66                            | 2.47              | Telmisartan       | Management of hypertension                                                                                                          |
| ZINC000084668739        | -7.62                            | 2.61              | Lifitegrast       | Treatment of keratoconjunctivitis sicca                                                                                             |
| ZINC000003978005        | -7.48                            | 3.32              | Dihydroergotamine | Treatment of migraines                                                                                                              |
| ZINC000036701290        | -7.47                            | 3.50              | Ponatinib         | Treatment of chronic myeloid leukemia and Philadelphia chromosome-positive acute lymphoblastic leukemia                             |
| ZINC000169621219        | -7.42                            | 3.66              | Eribulin          | Anticancer drug                                                                                                                     |
| <b>ZINC000100017856</b> | <b>-7.35</b>                     | <b>4.11</b>       | <b>Mepron</b>     | <b>Prevention of Pneumocystis pneumonia (PCP)</b>                                                                                   |
| ZINC000012503187        | -7.33                            | 4.65              | Conivaptan        | Treatment of hyponatremia                                                                                                           |
| <b>ZINC000003784182</b> | <b>-7.27</b>                     | <b>4.69</b>       | <b>Differin</b>   | <b>Treatment of mild-moderate acne</b>                                                                                              |
| ZINC000000601317        | -7.21                            | 5.27              | Difenoxin         | Treatment of diarrhea                                                                                                               |
| <b>ZINC000064033452</b> | <b>-7.18</b>                     | <b>5.84</b>       | <b>Lumacaftor</b> | <b>Acts as a chaperone during protein folding and increases the number of CFTR proteins that are trafficked to the cell surface</b> |
| ZINC000019632618        | -7.17                            | 5.58              | Imatinib          | Anticancer drug                                                                                                                     |
| ZINC000008101127        | -7.08                            | 8.75              | Indocyanine Green | Medical diagnostics                                                                                                                 |
| ZINC000011679756        | -6.96                            | 7.99              | Eltrombopag       | Developed for certain conditions that lead to thrombocytopenia                                                                      |
| ZINC000000538312        | -6.95                            | 8.04              | Risperdal         | Antipsychotic medication.                                                                                                           |
| ZINC000003977777        | -6.83                            | 9.96              | Cyclocort         | Treatment a variety of skin conditions                                                                                              |
| ZINC000003872566        | -6.76                            | 12.20             | Fexofenadine      | Antihistamine pharmaceutical drug                                                                                                   |
| ZINC000003925861        | -6.71                            | 12.16             | Vorapaxar         | Thrombin receptor antagonist                                                                                                        |
| ZINC000052955754        | -6.69                            | 12.53             | Ergotamine        | Treatment of acute migraine attacks                                                                                                 |
| ZINC000003816287        | -6.66                            | 13.60             | Axitinib          | Small molecule tyrosine kinase inhibitor                                                                                            |
| ZINC000006716957        | -6.61                            | 14.45             | Nilotinib         | Anticancer drug                                                                                                                     |



|                  |       |       |            |                    |
|------------------|-------|-------|------------|--------------------|
| ZINC000030691797 | -6.60 | 14.52 | Perampanel | Antiepileptic drug |
|------------------|-------|-------|------------|--------------------|

| Zinc code         | Lowest binding energy (kcal/mol) | Predicted Ki (μM) | Zinc code        | Lowest binding energy (kcal/mol) | Predicted Ki (μM) |
|-------------------|----------------------------------|-------------------|------------------|----------------------------------|-------------------|
| ZINC000164760756  | -6.58                            | 15.17             | ZINC000011617039 | -5.96                            | 43.36             |
| ZINC000001493878  | -6.54                            | 16.82             | ZINC000000538273 | -5.94                            | 44.00             |
| ZINC000164760874  | -6.54                            | 16.63             | ZINC000014768621 | -5.94                            | 45.62             |
| ZINC000066166864  | -6.53                            | 16.24             | ZINC000003993855 | -5.92                            | 46.00             |
| ZINC000100014909  | -6.53                            | 17.70             | ZINC000052716421 | -5.90                            | 47.48             |
| ZINC000000968264  | -6.51                            | 17.03             | ZINC000003797541 | -5.85                            | 51.50             |
| ZINC000003977978  | -6.38                            | 21.09             | ZINC000013129998 | -5.84                            | 52.60             |
| ZINC000043100709  | -6.35                            | 25.46             | ZINC000001481956 | -5.83                            | 54.35             |
| ZINC000070466416  | -6.32                            | 25.69             | ZINC000000537891 | -5.81                            | 55.01             |
| ZINC000001612996  | -6.34                            | 22.50             | ZINC000052509366 | -5.78                            | 57.80             |
| ZINC000148723177  | -6.27                            | 25.23             | ZINC000096903163 | -5.77                            | 58.57             |
| ZINC000034089131  | -6.26                            | 25.57             | ZINC000019796080 | -5.73                            | 67.12             |
| ZINC000203757351  | -6.26                            | 27.67             | ZINC000012503068 | -5.72                            | 64.26             |
| ZINC000068202099  | -6.19                            | 30.20             | ZINC000004175630 | -5.72                            | 66.60             |
| ZINC000004214700  | -6.18                            | 29.49             | ZINC000000537928 | -5.71                            | 67.80             |
| ZINC000043100953  | -6.16                            | 35.92             | ZINC000169621215 | -5.64                            | 73.57             |
| ZINC000040430143  | -6.11                            | 35.04             | ZINC000001996117 | -5.61                            | 78.33             |
| ZINC000035328014  | -6.11                            | 33.21             | ZINC000014879992 | -5.56                            | 84.62             |
| ZINC000003927822  | -6.08                            | 40.42             | ZINC000011681563 | -5.54                            | 86.64             |
| ZINC0000000000903 | -6.04                            | 37.32             | ZINC000003817234 | -5.53                            | 90.59             |
| ZINC000000001370  | -6.04                            | 37.45             | ZINC000034806477 | -5.51                            | 91.49             |
| ZINC000003826253  | -6.03                            | 37.82             | ZINC000100018598 | -5.48                            | 95.60             |
| ZINC000169344691  | -6.02                            | 39.01             | ZINC000004629876 | -5.45                            | 101.44            |
| ZINC000003881958  | -5.98                            | 41.11             | ZINC000118912517 | -5.44                            | 102.85            |
